# Supplementary material
Source: publisher figshare collection journal article supplement (https://acs.figshare.com/ndownloader/files/4556113)
Supplement: Supplementary file 1 [file 4556113]

## Supplementary Information

# Carbon-Sulfur Bond Cleavage of Methyl Substituted Thiophenes with Iridium(III)

*Matthew R. Grochowski, William W. Brennessel, and William D. Jones\**

Department of Chemistry, University of Rochester, Rochester, NY 14627 USA.

|                                                                                                          |        |
|----------------------------------------------------------------------------------------------------------|--------|
| Tables of ESI/MS data .....                                                                              | S2-S4  |
| X-ray structure determination details for <b>2</b> , <b>4</b> , <b>5</b> , <b>6</b> , and <b>8</b> ..... | S4-S25 |

ESI/MS results for **1**.

| Mass peak (m/z) | Actual(%) | Calculated(%) |
|-----------------|-----------|---------------|
| 813             | 2.7       | 2.1           |
| 812             | 12.2      | 7.8           |
| 811             | 46.5      | 29.6          |
| 810             | 48.0      | 28.6          |
| 809             | 100.0     | 100.0         |
| 808             | 48.4      | 26.0          |
| 807             | 94.8      | 89.3          |
| 806             | 18.9      | 7.0           |
| 805             | 34.3      | 23.7          |

ESI/MS results for Rxn. 9 containing compounds **5-7**.

| Mass peak (m/z) | Actual(%) | Calculated(%) |
|-----------------|-----------|---------------|
| 900             | 14.2      | 10.4          |
| 899             | 37.3      | 34.0          |
| 898             | 37.9      | 33.4          |
| 897             | 100.0     | 100.0         |
| 896             | 37.1      | 29.5          |
| 895             | 86.2      | 86.0          |
| 894             | 14.0      | 7.8           |
| 893             | 25.6      | 22.5          |
|                 |           |               |

ESI/MS results for Rxn. 9 containing compounds **3** and **4**..

| Mass peak (m/z) | Actual(%) | Calculated(%) |
|-----------------|-----------|---------------|
| 798             | 9.1       | 7.5           |
| 797             | 39.5      | 29.4          |
| 796             | 38.2      | 27.5          |
| 795             | 100.0     | 100.0         |
| 794             | 41.8      | 25.1          |
| 793             | 93.9      | 89.4          |
| 792             | 16.8      | 6.7           |
| 791             | 32.6      | 23.8          |

ESI/MS results for **8**.

| Mass peak (m/z) | Actual(%) | Calculated(%) |
|-----------------|-----------|---------------|
| 826             | 7.3       | 7.9           |
| 825             | 29.5      | 29.8          |
| 824             | 30.9      | 28.6          |
| 823             | 100.0     | 100.0         |
| 822             | 25.6      | 26.0          |
| 821             | 86.2      | 89.1          |
| 820             | 12.6      | 6.9           |
| 819             | 21.2      | 23.6          |

The peaks shown for compounds **5-7** were normalized relative to the peak at 897. The calculated % was found using the Sheffield Chemputer website and inputting the empirical formula with only one chlorine.

(<http://winter.group.shef.ac.uk/chemputer/isotopes.html>)

REFERENCE NUMBER: jonmg01

# CRYSTAL STRUCTURE REPORT

$C_{62} H_{91} Cl_6 Ir_5 S_4$

or

$\{[IrCp^*]_3(\mu_3-S)_2\}[IrCp^*Cl_3]_2 \cdot 2(2,5-Me_2\text{-thiophene}), 2$

Report prepared for:

M. Grochowski, Prof. W. Jones

May 16, 2007

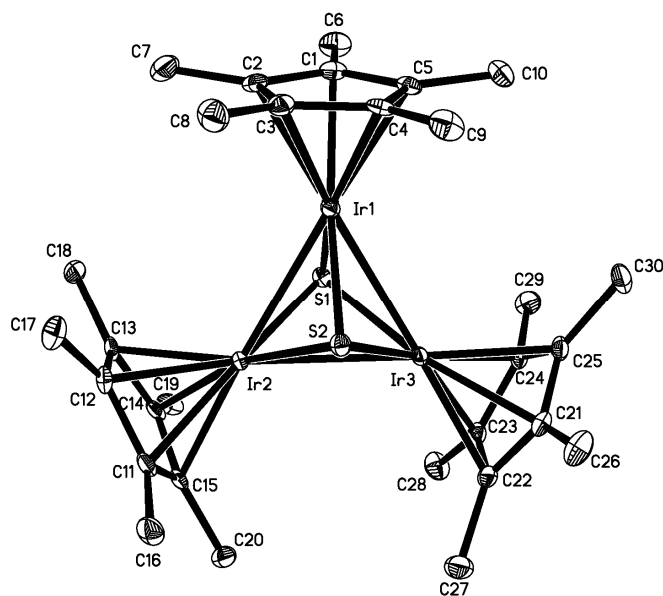

William W. Brennessel

X-ray Crystallographic Facility

Department of Chemistry

University of Rochester

120 Trustee Road

Rochester, NY 14627

### Data collection

A crystal (0.32 x 0.12 x 0.12 mm<sup>3</sup>) was placed onto the tip of a 0.1 mm diameter glass capillary tube or fiber and mounted on a Bruker SMART APEX II CCD Platform diffractometer for a data collection at 100.0(1) K.<sup>1</sup> A preliminary set of cell constants and an orientation matrix were calculated from 1112 reflections harvested from three sets of 20 frames. These initial sets of frames were oriented such that orthogonal wedges of reciprocal space were surveyed. The data collection was carried out using MoK $\alpha$  radiation (graphite monochromator) with a frame time of 10 seconds and a detector distance of 5.03 cm. A randomly oriented region of reciprocal space was surveyed: four major sections of frames were collected with 0.50° steps in  $\omega$  at four different  $\phi$  settings and a detector position of -33° in  $2\theta$ . The intensity data were corrected for absorption.<sup>2</sup> Final cell constants were calculated from the xyz centroids of 3925 strong reflections from the actual data collection after integration.<sup>3</sup> See Table S-1 for additional crystal and refinement information.

### Structure solution and refinement

The structure was solved using SIR97<sup>4</sup> and refined using SHELXL-97.<sup>5</sup> The space group *P*-1 was determined based on the lack of systematic absences and intensity statistics. A direct-methods solution was calculated which provided most non-hydrogen atoms from the E-map. Full-matrix least squares / difference Fourier cycles were performed which located the remaining non-hydrogen atoms. All non-hydrogen atoms were refined with anisotropic displacement parameters. All hydrogen atoms were placed in ideal positions and refined as riding atoms with relative isotropic displacement parameters. The final full matrix least squares refinement converged to  $R1 = 0.0234$  ( $F^2$ ,  $I > 2\sigma(I)$ ) and  $wR2 = 0.0508$  ( $F^2$ , all data).

### Structure description

The structure is similar to the one suggested. All atoms lie on general positions. The structure of the cation has been reported previously with PF<sub>6</sub><sup>-</sup> (refcode LEVFUN) and BF<sub>4</sub><sup>-</sup> (refcode YEVMIV) counterions.<sup>6</sup> There are two co-crystallized 2,5-dimethylthiophene solvent molecules per iridium dication.

Data collection, structure solution, and structure refinement were conducted at the X-ray Crystallographic Facility, B51 Hutchison Hall, Department of Chemistry, University of Rochester. All publications arising from this report MUST either 1) include William W. Brennessel as a coauthor or 2) acknowledge William W. Brennessel and the X-ray Crystallographic Facility of the Department of Chemistry at the University of Rochester.

- 
- <sup>1</sup> *APEX2*, version 2.1-0; Bruker AXS: Madison, WI, 2006.
- <sup>2</sup> Sheldrick, G. M. *SADABS*, version 2007/2; University of Göttingen: Göttingen, Germany, 2004.
- <sup>3</sup> *SAINT*, version 7.34A; Bruker AXS: Madison, WI, 2006.
- <sup>4</sup> Altomare, A.; Burla, M. C.; Camalli, M.; Cascarano, G. L.; Giacovazzo, C.; Guagliardi, A.; Moliterni, A. G. G.; Polidori, G.; Spagna, R. *SIR97: A new program for solving and refining crystal structures*; Istituto di Cristallografia, CNR: Bari, Italy, 1999.
- <sup>5</sup> *SHELXTL*, version 6.14; Bruker AXS: Madison, WI, 2000.
- <sup>6</sup> a) Venturelli, A.; Rauchfuss, T. B. *J. Am. Chem. Soc.* **1994**, *116*, 4824; b) Nishioka, T.; Isobe, K. *Chem. Lett.* **1994**, 1661.

Some equations of interest:

$$R_{\text{int}} = \Sigma |F_o^2 - \langle F_o^2 \rangle| / \Sigma |F_o^2|$$

$$R1 = \Sigma ||F_o| - |F_c|| / \Sigma |F_o|$$

$$wR2 = [\Sigma [w(F_o^2 - F_c^2)^2] / \Sigma [w(F_o^2)^2]]^{1/2}$$

where  $w = 1 / [\sigma^2(F_o^2) + (aP)^2 + bP]$  and

$$P = 1/3 \max (0, F_o^2) + 2/3 F_c^2$$

$$\text{GOF} = S = [\Sigma [w(F_o^2 - F_c^2)^2] / (m-n)]^{1/2}$$

where  $m$  = number of reflections and  $n$  = number of parameters

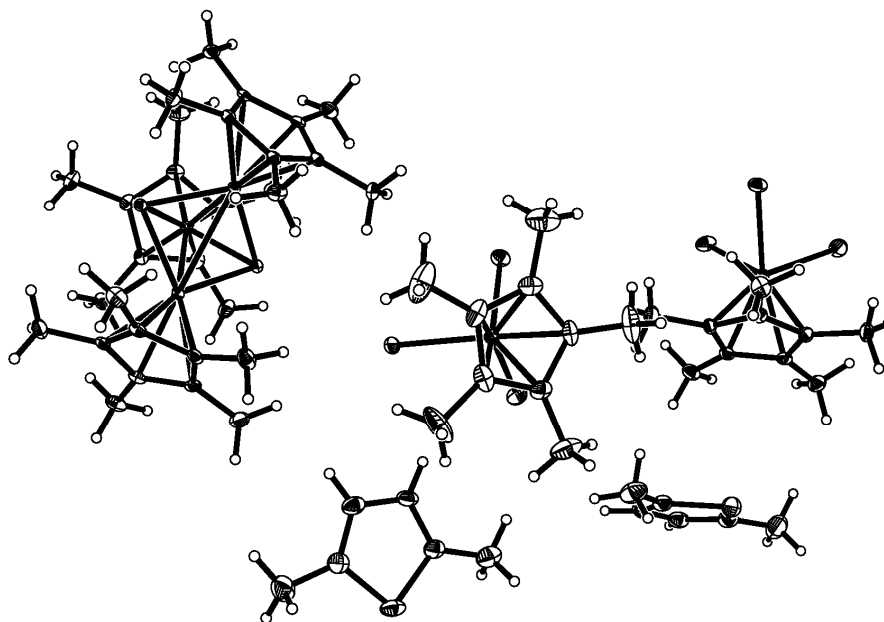

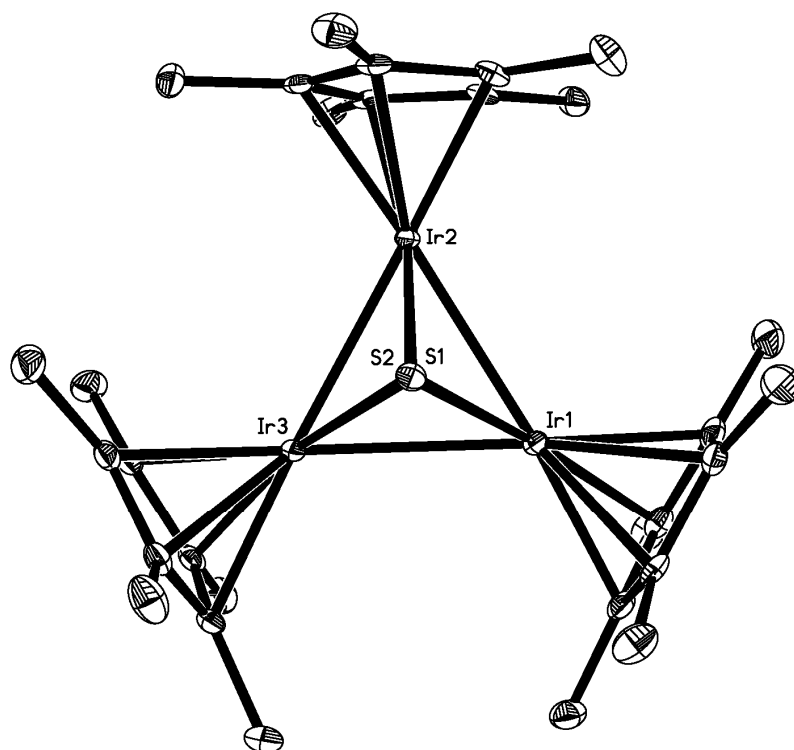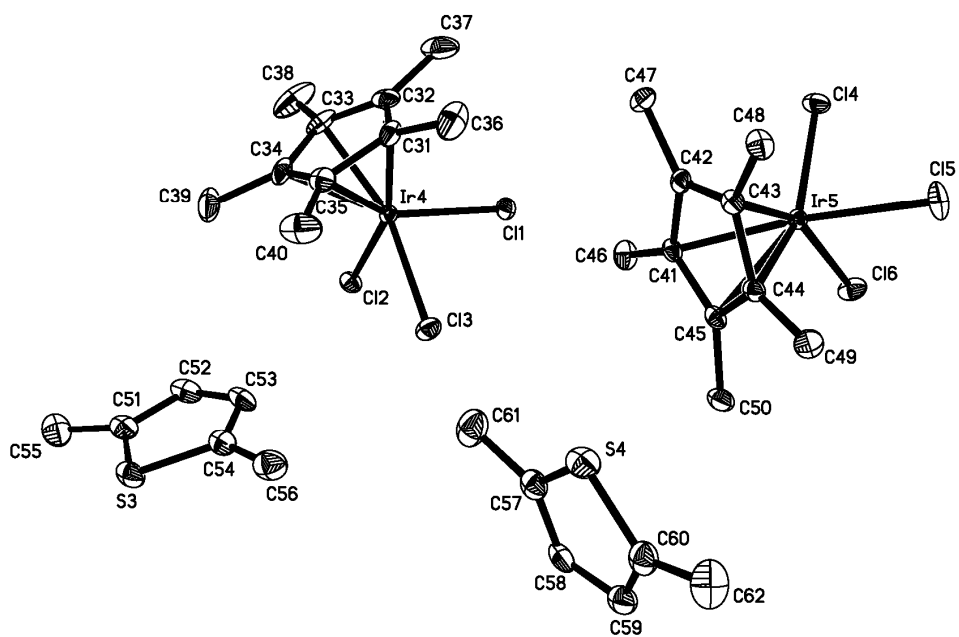

Table S-1. Crystal data and structure refinement for {[IrCp\*]<sub>3</sub>(μ<sub>3</sub>-S)<sub>2</sub>}[IrCp\*Cl<sub>3</sub>]<sub>2</sub>, **2**.

|                                                     |                                                                                |                       |
|-----------------------------------------------------|--------------------------------------------------------------------------------|-----------------------|
| Identification code                                 | jonmg01                                                                        |                       |
| Empirical formula                                   | C <sub>62</sub> H <sub>91</sub> Cl <sub>6</sub> Ir <sub>5</sub> S <sub>4</sub> |                       |
| Formula weight                                      | 2138.29                                                                        |                       |
| Temperature                                         | 100.0(1) K                                                                     |                       |
| Wavelength                                          | 0.71073 Å                                                                      |                       |
| Crystal system                                      | Triclinic                                                                      |                       |
| Space group                                         | <i>P</i> -1                                                                    |                       |
| Unit cell dimensions                                | <i>a</i> = 10.9688(9) Å                                                        | $\alpha$ = 72.210(1)° |
|                                                     | <i>b</i> = 16.3357(13) Å                                                       | $\beta$ = 78.404(1)°  |
|                                                     | <i>c</i> = 20.4096(16) Å                                                       | $\gamma$ = 87.161(1)° |
| Volume                                              | 3410.8(5) Å <sup>3</sup>                                                       |                       |
| <i>Z</i>                                            | 2                                                                              |                       |
| Density (calculated)                                | 2.082 Mg/m <sup>3</sup>                                                        |                       |
| Absorption coefficient                              | 10.113 mm <sup>-1</sup>                                                        |                       |
| <i>F</i> (000)                                      | 2028                                                                           |                       |
| Crystal color, morphology                           | orange, block                                                                  |                       |
| Crystal size                                        | 0.32 x 0.12 x 0.12 mm <sup>3</sup>                                             |                       |
| Theta range for data collection                     | 1.90 to 32.03°                                                                 |                       |
| Index ranges                                        | -16 ≤ <i>h</i> ≤ 16, -24 ≤ <i>k</i> ≤ 24, -30 ≤ <i>l</i> ≤ 30                  |                       |
| Reflections collected                               | 60766                                                                          |                       |
| Independent reflections                             | 23487 [ <i>R</i> (int) = 0.0287]                                               |                       |
| Observed reflections                                | 20560                                                                          |                       |
| Completeness to theta = 32.03°                      | 98.9%                                                                          |                       |
| Absorption correction                               | Multi-scan                                                                     |                       |
| Max. and min. transmission                          | 0.2966 and 0.1102                                                              |                       |
| Refinement method                                   | Full-matrix least-squares on <i>F</i> <sup>2</sup>                             |                       |
| Data / restraints / parameters                      | 23487 / 0 / 723                                                                |                       |
| Goodness-of-fit on <i>F</i> <sup>2</sup>            | 1.019                                                                          |                       |
| Final <i>R</i> indices [ <i>I</i> > 2σ( <i>I</i> )] | <i>R</i> 1 = 0.0234, <i>wR</i> 2 = 0.0490                                      |                       |
| <i>R</i> indices (all data)                         | <i>R</i> 1 = 0.0296, <i>wR</i> 2 = 0.0508                                      |                       |
| Largest diff. peak and hole                         | 2.118 and -1.343 e.Å <sup>-3</sup>                                             |                       |



REFERENCE NUMBER: jonmg10

# CRYSTAL STRUCTURE REPORT

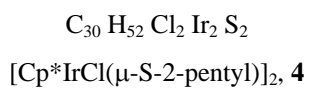

Report prepared for:  
M. Grochowski, Prof. W. Jones

December 20, 2007

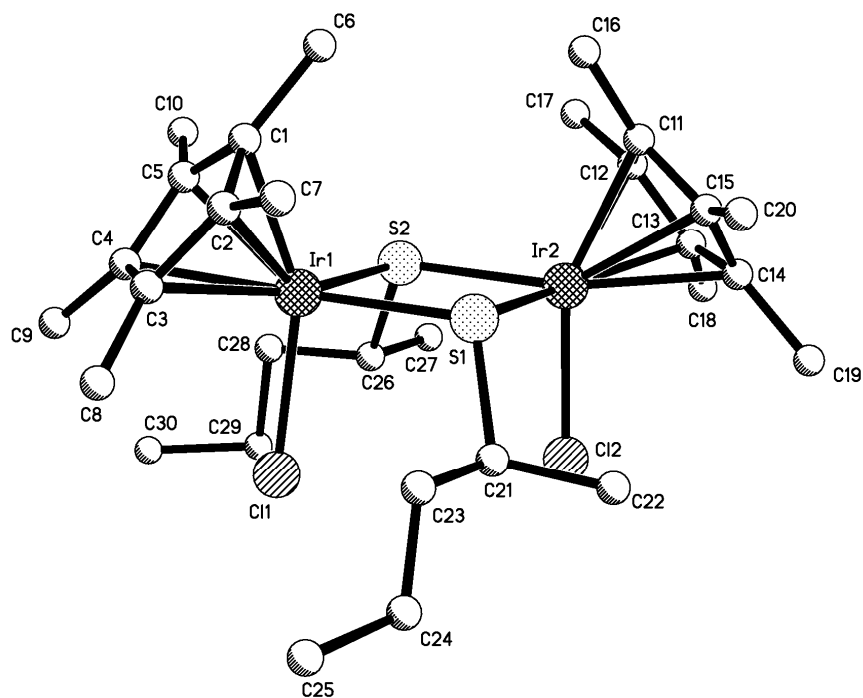

William W. Brennessel  
X-ray Crystallographic Facility  
Department of Chemistry  
University of Rochester  
120 Trustee Road  
Rochester, NY 14627

### Data collection

A crystal (0.16 x 0.10 x 0.01 mm<sup>3</sup>) was placed onto the tip of a 0.1 mm diameter glass capillary tube or fiber and mounted on a Bruker SMART APEX II CCD Platform diffractometer for a data collection at 100.0(1) K.<sup>1</sup> A preliminary set of cell constants and an orientation matrix were calculated from 181 reflections harvested from three sets of 20 frames. These initial sets of frames were oriented such that orthogonal wedges of reciprocal space were surveyed. The data collection was carried out using MoK $\alpha$  radiation (graphite monochromator) with a frame time of 120 seconds and a detector distance of 4.98 cm. A randomly oriented region of reciprocal space was surveyed: three major sections of frames were collected with 2.00° steps in  $\omega$  at three different  $\phi$  settings and a detector position of -33° in  $2\theta$ . The intensity data were corrected for absorption.<sup>2</sup> Final cell constants were calculated from the xyz centroids of 2278 strong reflections from the actual data collection after integration.<sup>3</sup> See Table S-2 for additional crystal and refinement information.

### Structure solution and refinement

The structure was solved using SIR97<sup>4</sup> and refined using SHELXL-97.<sup>5</sup> The space group  $P2_1/c$  was determined based on systematic absences and intensity statistics. A direct-methods solution was calculated which provided most non-hydrogen atoms from the E-map. Full-matrix least squares / difference Fourier cycles were performed which located the remaining non-hydrogen atoms. The Ir, Cl, and S atoms were refined with anisotropic displacement parameters; all others were refined with isotropic displacement parameters. All hydrogen atoms were placed in ideal positions and refined as riding atoms with relative isotropic displacement parameters. The final full matrix least squares refinement converged to  $R1 = 0.1462$  ( $F^2$ ,  $I > 2\sigma(I)$ ) and  $wR2 = 0.3305$  ( $F^2$ , all data). *This structure report may be used for connectivity purposes only.*

### Structure description

The structure is the one suggested. All atoms lie in general positions. The pentamethylcyclopentadienyl (Cp\*) groups were refined as ideal rigid groups.

Data collection, structure solution, and structure refinement were conducted at the X-ray Crystallographic Facility, B51 Hutchison Hall, Department of Chemistry, University of Rochester. All publications arising from this report MUST either 1) include William W. Brennessel as a coauthor or 2) acknowledge William W. Brennessel and the X-ray Crystallographic Facility of the Department of Chemistry at the University of Rochester.

- 
- <sup>1</sup> *APEX2*, version 2.1-0; Bruker AXS: Madison, WI, 2006.
- <sup>2</sup> Sheldrick, G. M. *SADABS*, version 2007/2; University of Göttingen: Göttingen, Germany, 2004.
- <sup>3</sup> *SAINT*, version 7.34A; Bruker AXS: Madison, WI, 2006.
- <sup>4</sup> Altomare, A.; Burla, M. C.; Camalli, M.; Cascarano, G. L.; Giacovazzo, C.; Guagliardi, A.; Moliterni, A. G. G.; Polidori, G.; Spagna, R. *SIR97: A new program for solving and refining crystal structures*; Istituto di Cristallografia, CNR: Bari, Italy, 1999.
- <sup>5</sup> *SHELXTL*, version 6.14; Bruker AXS: Madison, WI, 2000.

Some equations of interest:

$$R_{\text{int}} = \Sigma |F_o^2 - \langle F_o^2 \rangle| / \Sigma |F_o^2|$$

$$R1 = \Sigma ||F_o| - |F_c|| / \Sigma |F_o|$$

$$wR2 = [\Sigma [w(F_o^2 - F_c^2)^2] / \Sigma [w(F_o^2)^2]]^{1/2}$$

where  $w = 1 / [\sigma^2(F_o^2) + (aP)^2 + bP]$  and

$$P = 1/3 \max (0, F_o^2) + 2/3 F_c^2$$

$$\text{GOF} = S = [\Sigma [w(F_o^2 - F_c^2)^2] / (m-n)]^{1/2}$$

where  $m$  = number of reflections and  $n$  = number of parameters

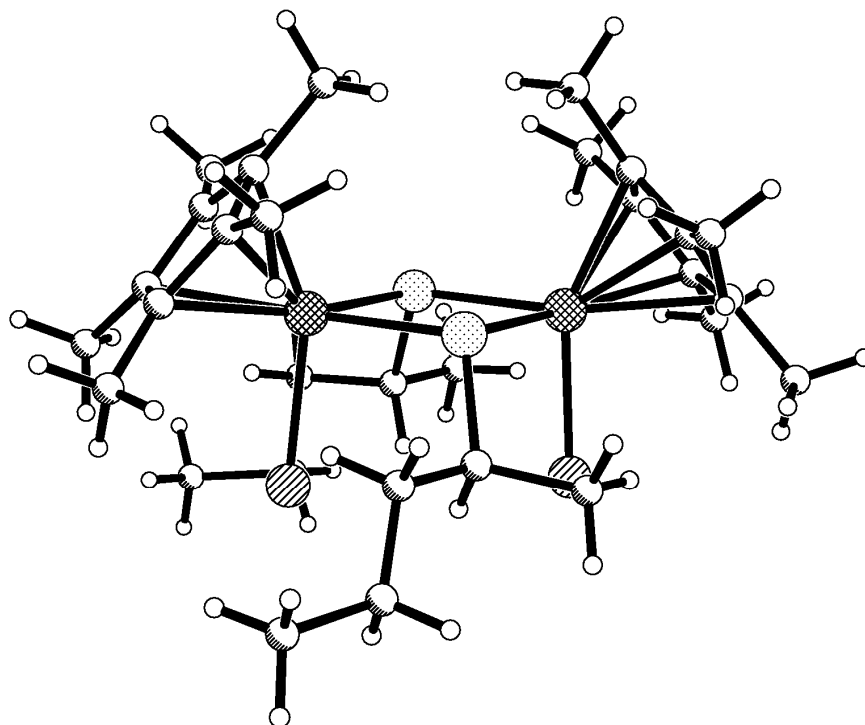

Table S-2. Crystal data and structure refinement for [Cp\*IrCl( $\mu$ -S-2-pentyl)]<sub>2</sub>, **4**.

|                                                     |                                                                                |                           |
|-----------------------------------------------------|--------------------------------------------------------------------------------|---------------------------|
| Identification code                                 | jonmg10                                                                        |                           |
| Empirical formula                                   | C <sub>30</sub> H <sub>52</sub> Cl <sub>2</sub> Ir <sub>2</sub> S <sub>2</sub> |                           |
| Formula weight                                      | 932.14                                                                         |                           |
| Temperature                                         | 100.0(1) K                                                                     |                           |
| Wavelength                                          | 0.71073 Å                                                                      |                           |
| Crystal system                                      | Monoclinic                                                                     |                           |
| Space group                                         | <i>P</i> 2 <sub>1</sub> / <i>c</i>                                             |                           |
| Unit cell dimensions                                | <i>a</i> = 11.869(6) Å                                                         | $\alpha = 90^\circ$       |
|                                                     | <i>b</i> = 8.794(5) Å                                                          | $\beta = 91.713(7)^\circ$ |
|                                                     | <i>c</i> = 32.001(17) Å                                                        | $\gamma = 90^\circ$       |
| Volume                                              | 3338(3) Å <sup>3</sup>                                                         |                           |
| <i>Z</i>                                            | 4                                                                              |                           |
| Density (calculated)                                | 1.855 Mg/m <sup>3</sup>                                                        |                           |
| Absorption coefficient                              | 8.267 mm <sup>-1</sup>                                                         |                           |
| <i>F</i> (000)                                      | 1808                                                                           |                           |
| Crystal color, morphology                           | yellow, plate                                                                  |                           |
| Crystal size                                        | 0.16 x 0.10 x 0.01 mm <sup>3</sup>                                             |                           |
| Theta range for data collection                     | 2.11 to 25.12°                                                                 |                           |
| Index ranges                                        | -14 ≤ <i>h</i> ≤ 13, -9 ≤ <i>k</i> ≤ 10, -38 ≤ <i>l</i> ≤ 38                   |                           |
| Reflections collected                               | 21303                                                                          |                           |
| Independent reflections                             | 5944 [ <i>R</i> (int) = 0.3382]                                                |                           |
| Observed reflections                                | 2135                                                                           |                           |
| Completeness to theta = 25.12°                      | 99.4%                                                                          |                           |
| Absorption correction                               | Multi-scan                                                                     |                           |
| Max. and min. transmission                          | 0.9598 and 0.3513                                                              |                           |
| Refinement method                                   | Full-matrix least-squares on <i>F</i> <sup>2</sup>                             |                           |
| Data / restraints / parameters                      | 5944 / 0 / 129                                                                 |                           |
| Goodness-of-fit on <i>F</i> <sup>2</sup>            | 1.032                                                                          |                           |
| Final <i>R</i> indices [ <i>I</i> > 2σ( <i>I</i> )] | <i>R</i> 1 = 0.1462, <i>wR</i> 2 = 0.2680                                      |                           |
| <i>R</i> indices (all data)                         | <i>R</i> 1 = 0.3215, <i>wR</i> 2 = 0.3305                                      |                           |
| Largest diff. peak and hole                         | 1.948 and -2.922 e.Å <sup>-3</sup>                                             |                           |

REFERENCE NUMBER: jonmg06

CRYSTAL STRUCTURE REPORT

$C_{25} H_{42} Cl_2 Ir_2 S$

or

$[Cp^*IrCl]_2(\mu-H)(\mu-S-n-pentyl)$ , **5**

Report prepared for:

M. Grochowski, Prof. W. Jones

September 09, 2007

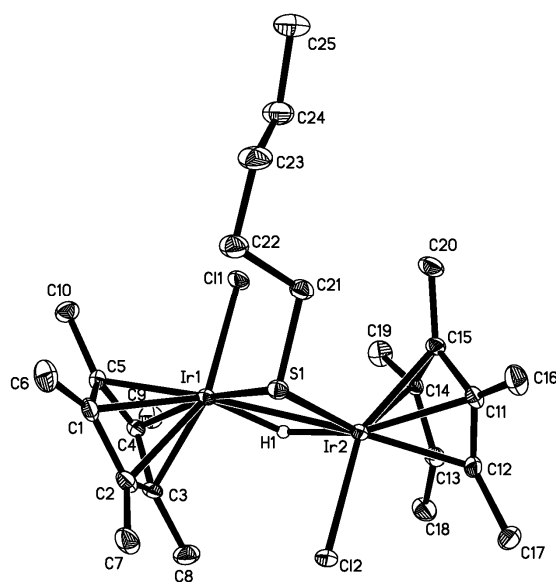

William W. Brennessel

X-ray Crystallographic Facility

Department of Chemistry

University of Rochester

120 Trustee Road

Rochester, NY 14627

### Data collection

A crystal (0.44 x 0.10 x 0.06 mm<sup>3</sup>) was placed onto the tip of a 0.1 mm diameter glass capillary tube or fiber and mounted on a Bruker SMART APEX II CCD Platform diffractometer for a data collection at 100.0(1) K.<sup>1</sup> A preliminary set of cell constants and an orientation matrix were calculated from 803 reflections harvested from three sets of 20 frames. These initial sets of frames were oriented such that orthogonal wedges of reciprocal space were surveyed. The data collection was carried out using MoK $\alpha$  radiation (graphite monochromator) with a frame time of 10 seconds and a detector distance of 5.00 cm. A randomly oriented region of reciprocal space was surveyed: four major sections of frames were collected with 0.50° steps in  $\omega$  at four different  $\phi$  settings and a detector position of -33° in  $2\theta$ . The intensity data were corrected for absorption.<sup>2</sup> Final cell constants were calculated from the xyz centroids of 3930 strong reflections from the actual data collection after integration.<sup>3</sup> See Table S-3 for additional crystal and refinement information.

### Structure solution and refinement

The structure was solved using SIR97<sup>4</sup> and refined using SHELXL-97.<sup>5</sup> The space group  $P2_1/c$  was determined based on systematic absences and intensity statistics. A direct-methods solution was calculated which provided most non-hydrogen atoms from the E-map. Full-matrix least squares / difference Fourier cycles were performed which located the remaining non-hydrogen atoms. All non-hydrogen atoms were refined with anisotropic displacement parameters. All hydrogen atoms, including H1, were placed in ideal positions and refined as riding atoms with relative isotropic displacement parameters. Hydrogen atom H1 was refined relative to an iridium atom. The final full matrix least squares refinement converged to  $R1 = 0.0243$  ( $F^2$ ,  $I > 2\sigma(I)$ ) and  $wR2 = 0.0474$  ( $F^2$ , all data).

### Structure description

The structure is the one suggested. All atoms lie on general positions. The pentyl chain abuts the inversion symmetry equivalent of itself, thus allowing for an efficient packing motif.

Data collection, structure solution, and structure refinement were conducted at the X-ray Crystallographic Facility, B51 Hutchison Hall, Department of Chemistry, University of Rochester. All publications arising from this report MUST either 1) include William W. Brennessel as a coauthor or 2) acknowledge William W. Brennessel and the X-ray Crystallographic Facility of the Department of Chemistry at the University of Rochester.

- 
- <sup>1</sup> *APEX2*, version 2.1-0; Bruker AXS: Madison, WI, 2006.
- <sup>2</sup> Sheldrick, G. M. *SADABS*, version 2007/2; University of Göttingen: Göttingen, Germany, 2004.
- <sup>3</sup> *SAINT*, version 7.34A; Bruker AXS: Madison, WI, 2006.
- <sup>4</sup> Altomare, A.; Burla, M. C.; Camalli, M.; Cascarano, G. L.; Giacovazzo, C.; Guagliardi, A.; Moliterni, A. G. G.; Polidori, G.; Spagna, R. *SIR97: A new program for solving and refining crystal structures*; Istituto di Cristallografia, CNR: Bari, Italy, 1999.
- <sup>5</sup> *SHELXTL*, version 6.14; Bruker AXS: Madison, WI, 2000.

Some equations of interest:

$$R_{\text{int}} = \Sigma |F_o^2 - \langle F_o^2 \rangle| / \Sigma |F_o^2|$$

$$R1 = \Sigma ||F_o| - |F_c|| / \Sigma |F_o|$$

$$wR2 = [\Sigma [w(F_o^2 - F_c^2)^2] / \Sigma [w(F_o^2)^2]]^{1/2}$$

where  $w = 1 / [\sigma^2(F_o^2) + (aP)^2 + bP]$  and

$$P = 1/3 \max(0, F_o^2) + 2/3 F_c^2$$

$$\text{GOF} = S = [\Sigma [w(F_o^2 - F_c^2)^2] / (m-n)]^{1/2}$$

where  $m$  = number of reflections and  $n$  = number of parameters

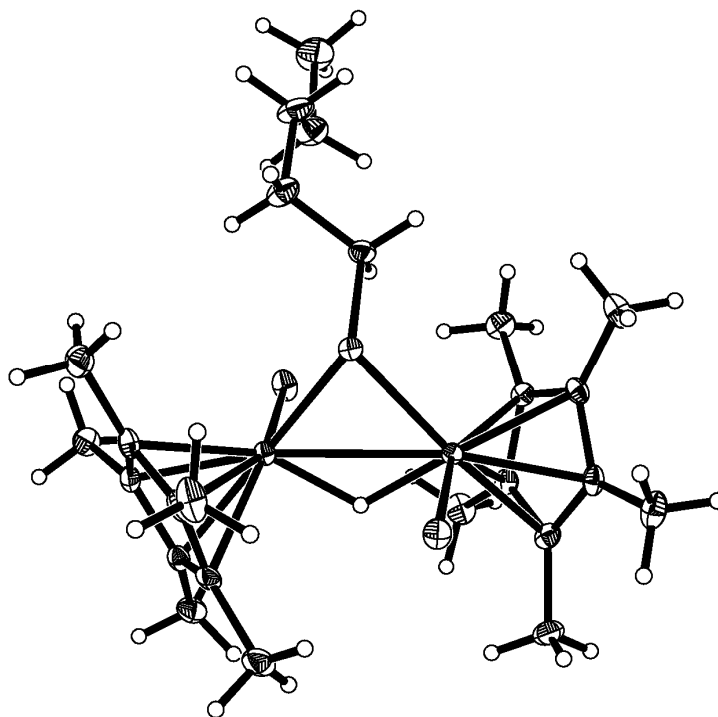

Table S-3. Crystal data and structure refinement for [Cp\*IrCl]<sub>2</sub>(μ-H)(μ-S-n-pentyl), **5**.

|                                                     |                                                                   |                           |
|-----------------------------------------------------|-------------------------------------------------------------------|---------------------------|
| Identification code                                 | jonmg06                                                           |                           |
| Empirical formula                                   | C <sub>25</sub> H <sub>42</sub> Cl <sub>2</sub> Ir <sub>2</sub> S |                           |
| Formula weight                                      | 829.95                                                            |                           |
| Temperature                                         | 100.0(1) K                                                        |                           |
| Wavelength                                          | 0.71073 Å                                                         |                           |
| Crystal system                                      | Monoclinic                                                        |                           |
| Space group                                         | <i>P</i> 2 <sub>1</sub> / <i>c</i>                                |                           |
| Unit cell dimensions                                | <i>a</i> = 9.3884(14) Å                                           | $\alpha = 90^\circ$       |
|                                                     | <i>b</i> = 15.392(2) Å                                            | $\beta = 94.886(2)^\circ$ |
|                                                     | <i>c</i> = 19.126(3) Å                                            | $\gamma = 90^\circ$       |
| Volume                                              | 2753.7(7) Å <sup>3</sup>                                          |                           |
| <i>Z</i>                                            | 4                                                                 |                           |
| Density (calculated)                                | 2.002 Mg/m <sup>3</sup>                                           |                           |
| Absorption coefficient                              | 9.936 mm <sup>-1</sup>                                            |                           |
| <i>F</i> (000)                                      | 1584                                                              |                           |
| Crystal color, morphology                           | red-orange, needle                                                |                           |
| Crystal size                                        | 0.44 x 0.10 x 0.06 mm <sup>3</sup>                                |                           |
| Theta range for data collection                     | 1.70 to 32.58°                                                    |                           |
| Index ranges                                        | -14 ≤ <i>h</i> ≤ 14, -23 ≤ <i>k</i> ≤ 23, -28 ≤ <i>l</i> ≤ 28     |                           |
| Reflections collected                               | 48913                                                             |                           |
| Independent reflections                             | 9961 [ <i>R</i> (int) = 0.0443]                                   |                           |
| Observed reflections                                | 8125                                                              |                           |
| Completeness to theta = 32.58°                      | 99.3%                                                             |                           |
| Absorption correction                               | Multi-scan                                                        |                           |
| Max. and min. transmission                          | 0.5571 and 0.0911                                                 |                           |
| Refinement method                                   | Full-matrix least-squares on <i>F</i> <sup>2</sup>                |                           |
| Data / restraints / parameters                      | 9961 / 0 / 282                                                    |                           |
| Goodness-of-fit on <i>F</i> <sup>2</sup>            | 1.027                                                             |                           |
| Final <i>R</i> indices [ <i>I</i> > 2σ( <i>I</i> )] | <i>R</i> 1 = 0.0243, <i>wR</i> 2 = 0.0442                         |                           |
| <i>R</i> indices (all data)                         | <i>R</i> 1 = 0.0368, <i>wR</i> 2 = 0.0474                         |                           |
| Largest diff. peak and hole                         | 1.237 and -0.909 e.Å <sup>-3</sup>                                |                           |



REFERENCE NUMBER: jonmg07

# CRYSTAL STRUCTURE REPORT

$C_{30} H_{52} Cl_2 Ir_2 S_2$

or

$[Cp^*IrCl(\mu-S-n-pentyl)]_2$ , **6**

Report prepared for:

M. Grochowski, Prof. W. Jones

September 13, 2007

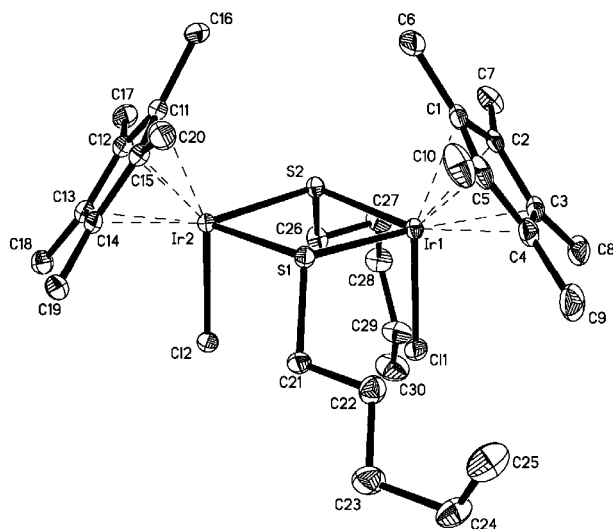

William W. Brennessel

X-ray Crystallographic Facility

Department of Chemistry

University of Rochester

120 Trustee Road

Rochester, NY 14627

### Data collection

A crystal (0.24 x 0.20 x 0.04 mm<sup>3</sup>) was placed onto the tip of a 0.1 mm diameter glass capillary tube or fiber and mounted on a Bruker SMART APEX II CCD Platform diffractometer for a data collection at 100.0(1) K.<sup>1</sup> A preliminary set of cell constants and an orientation matrix were calculated from 666 reflections harvested from three sets of 20 frames. These initial sets of frames were oriented such that orthogonal wedges of reciprocal space were surveyed. The data collection was carried out using MoK $\alpha$  radiation (graphite monochromator) with a frame time of 15 seconds and a detector distance of 5.00 cm. A randomly oriented region of reciprocal space was surveyed: four major sections of frames were collected with 0.50° steps in  $\omega$  at four different  $\phi$  settings and a detector position of -33° in  $2\theta$ . The intensity data were corrected for absorption.<sup>2</sup> Final cell constants were calculated from the xyz centroids of 3981 strong reflections from the actual data collection after integration.<sup>3</sup> See Table S-4 for additional crystal and refinement information.

### Structure solution and refinement

The structure was solved using SIR97<sup>4</sup> and refined using SHELXL-97.<sup>5</sup> The space group *C2/c* was determined based on systematic absences and intensity statistics. A direct-methods solution was calculated which provided most non-hydrogen atoms from the E-map. Full-matrix least squares / difference Fourier cycles were performed which located the remaining non-hydrogen atoms. All non-hydrogen atoms were refined with anisotropic displacement parameters. All hydrogen atoms were placed in ideal positions and refined as riding atoms with relative isotropic displacement parameters. The final full matrix least squares refinement converged to  $R1 = 0.0278$  ( $F^2$ ,  $I > 2\sigma(I)$ ) and  $wR2 = 0.0572$  ( $F^2$ , all data).

### Structure description

The structure is the one suggested. All atoms lie in general positions. One of the Cp\* methyl groups is modeled as rotationally disordered.

Data collection, structure solution, and structure refinement were conducted at the X-ray Crystallographic Facility, B51 Hutchison Hall, Department of Chemistry, University of Rochester. All publications arising from this report MUST either 1) include William W. Brennessel as a coauthor or 2) acknowledge William W. Brennessel and the X-ray Crystallographic Facility of the Department of Chemistry at the University of Rochester.

- 
- <sup>1</sup> *APEX2*, version 2.1-0; Bruker AXS: Madison, WI, 2006.
- <sup>2</sup> Sheldrick, G. M. *SADABS*, version 2007/2; University of Göttingen: Göttingen, Germany, 2004.
- <sup>3</sup> *SAINT*, version 7.34A; Bruker AXS: Madison, WI, 2006.
- <sup>4</sup> Altomare, A.; Burla, M. C.; Camalli, M.; Cascarano, G. L.; Giacovazzo, C.; Guagliardi, A.; Moliterni, A. G. G.; Polidori, G.; Spagna, R. *SIR97: A new program for solving and refining crystal structures*; Istituto di Cristallografia, CNR: Bari, Italy, 1999.
- <sup>5</sup> *SHELXTL*, version 6.14; Bruker AXS: Madison, WI, 2000.

Some equations of interest:

$$R_{\text{int}} = \Sigma |F_o^2 - \langle F_o^2 \rangle| / \Sigma |F_o^2|$$

$$R1 = \Sigma ||F_o| - |F_c|| / \Sigma |F_o|$$

$$wR2 = [\Sigma [w(F_o^2 - F_c^2)^2] / \Sigma [w(F_o^2)^2]]^{1/2}$$

where  $w = 1 / [\sigma^2(F_o^2) + (aP)^2 + bP]$  and

$$P = 1/3 \max(0, F_o^2) + 2/3 F_c^2$$

$$\text{GOF} = S = [\Sigma [w(F_o^2 - F_c^2)^2] / (m-n)]^{1/2}$$

where  $m$  = number of reflections and  $n$  = number of parameters

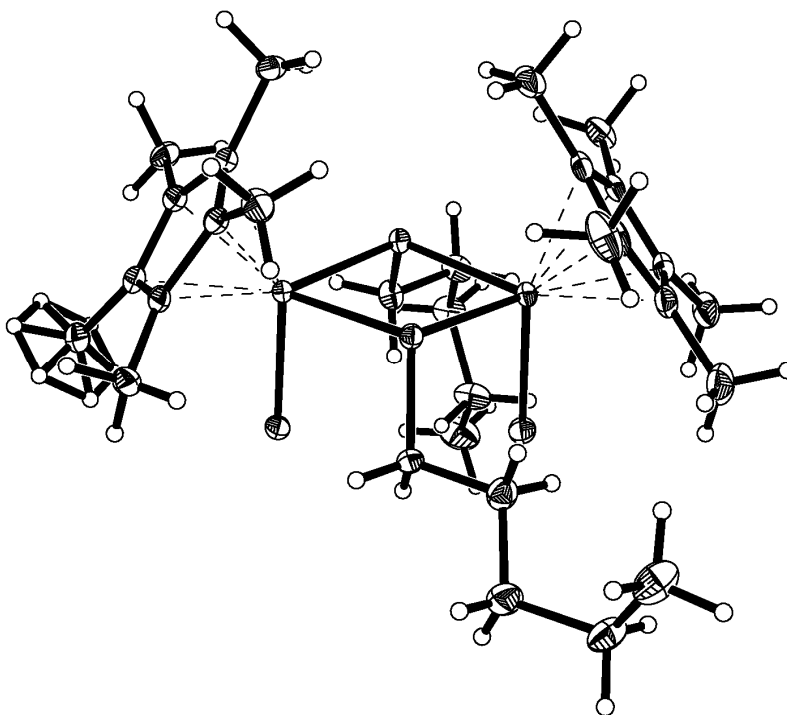

Table S-4. Crystal data and structure refinement for [Cp\*IrCl( $\mu$ -S-n-pentyl)]<sub>2</sub>, **6**.

|                                        |                                                                                |                            |
|----------------------------------------|--------------------------------------------------------------------------------|----------------------------|
| Identification code                    | jonmg07                                                                        |                            |
| Empirical formula                      | C <sub>30</sub> H <sub>52</sub> Cl <sub>2</sub> Ir <sub>2</sub> S <sub>2</sub> |                            |
| Formula weight                         | 932.14                                                                         |                            |
| Temperature                            | 100.0(1) K                                                                     |                            |
| Wavelength                             | 0.71073 Å                                                                      |                            |
| Crystal system                         | Monoclinic                                                                     |                            |
| Space group                            | C2/c                                                                           |                            |
| Unit cell dimensions                   | $a = 22.620(3)$ Å                                                              | $\alpha = 90^\circ$        |
|                                        | $b = 16.173(2)$ Å                                                              | $\beta = 119.903(2)^\circ$ |
|                                        | $c = 20.926(3)$ Å                                                              | $\gamma = 90^\circ$        |
| Volume                                 | 6636.5(14) Å <sup>3</sup>                                                      |                            |
| Z                                      | 8                                                                              |                            |
| Density (calculated)                   | 1.866 Mg/m <sup>3</sup>                                                        |                            |
| Absorption coefficient                 | 8.317 mm <sup>-1</sup>                                                         |                            |
| $F(000)$                               | 3616                                                                           |                            |
| Crystal color, morphology              | yellow-orange, plate                                                           |                            |
| Crystal size                           | 0.24 x 0.20 x 0.04 mm <sup>3</sup>                                             |                            |
| Theta range for data collection        | 1.63 to 32.58°                                                                 |                            |
| Index ranges                           | $-34 \leq h \leq 34, -24 \leq k \leq 24, -31 \leq l \leq 31$                   |                            |
| Reflections collected                  | 59112                                                                          |                            |
| Independent reflections                | 11983 [ $R(\text{int}) = 0.0560$ ]                                             |                            |
| Observed reflections                   | 9367                                                                           |                            |
| Completeness to $\theta = 32.58^\circ$ | 99.2%                                                                          |                            |
| Absorption correction                  | Multi-scan                                                                     |                            |
| Max. and min. transmission             | 0.7120 and 0.1401                                                              |                            |
| Refinement method                      | Full-matrix least-squares on $F^2$                                             |                            |
| Data / restraints / parameters         | 11983 / 0 / 337                                                                |                            |
| Goodness-of-fit on $F^2$               | 1.017                                                                          |                            |
| Final $R$ indices [ $I > 2\sigma(I)$ ] | $R1 = 0.0278, wR2 = 0.0521$                                                    |                            |
| $R$ indices (all data)                 | $R1 = 0.0457, wR2 = 0.0572$                                                    |                            |
| Largest diff. peak and hole            | 1.459 and -1.698 e.Å <sup>-3</sup>                                             |                            |

REFERENCE NUMBER: jonmg18

CRYSTAL STRUCTURE REPORT

$C_{26} H_{42} Cl_2 Ir_2 O S$

or

$[IrClCp^*]_2(\mu-H)[\mu-SCH(COCH_3)(C_3H_7)], \mathbf{8}$

Report prepared for:

M. Grochowski, Prof. W. Jones

September 11, 2008

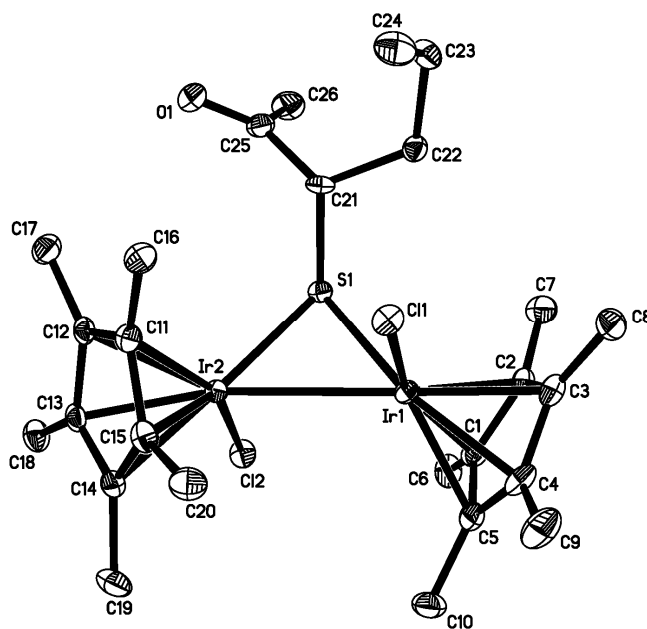

William W. Brennessel

X-ray Crystallographic Facility

Department of Chemistry, University of Rochester

120 Trustee Road

Rochester, NY 14627

### Data collection

A crystal (0.26 x 0.20 x 0.05 mm<sup>3</sup>) was placed onto the tip of a 0.1 mm diameter glass capillary tube or fiber and mounted on a Bruker SMART APEX II CCD Platform diffractometer for a data collection at 100.0(1) K.<sup>1</sup> A preliminary set of cell constants and an orientation matrix were calculated from reflections harvested from three orthogonal wedges of reciprocal space. The full data collection was carried out using MoK $\alpha$  radiation (graphite monochromator) with a frame time of 25 seconds and a detector distance of 4.00 cm. A randomly oriented region of reciprocal space was surveyed: four major sections of frames were collected with 0.50° steps in  $\omega$  at four different  $\phi$  settings and a detector position of -38° in  $2\theta$ . The intensity data were corrected for absorption.<sup>2</sup> Final cell constants were calculated from the xyz centroids of 4068 strong reflections from the actual data collection after integration.<sup>3</sup> See Table S-5 for additional crystal and refinement information.

### Structure solution and refinement

The structure was solved using SIR97<sup>4</sup> and refined using SHELXL-97.<sup>5</sup> The space group  $Pca2_1$  was determined based on systematic absences and intensity statistics. A direct-methods solution was calculated which provided most non-hydrogen atoms from the E-map. Full-matrix least squares / difference Fourier cycles were performed which located the remaining non-hydrogen atoms. All non-hydrogen atoms were refined with anisotropic displacement parameters. The bridging hydride atom could not be located in the difference Fourier map. It was omitted from the atom list, but included in the molecular formula. All other hydrogen atoms were placed in ideal positions and refined as riding atoms with relative isotropic displacement parameters. The final full matrix least squares refinement converged to  $R1 = 0.0370$  ( $F^2$ ,  $I > 2\sigma(I)$ ) and  $wR2 = 0.0762$  ( $F^2$ , all data).

### Structure description

The structure is similar to the one suggested. There are two independent molecules in the asymmetric unit with all atoms in general positions.

Unless noted otherwise all structural diagrams containing thermal displacement ellipsoids are drawn at the 50 % probability level.

Data collection, structure solution, and structure refinement were conducted at the X-ray Crystallographic Facility, B51 Hutchison Hall, Department of Chemistry, University of Rochester. All publications arising from this report MUST either 1) include William W. Brennessel as a coauthor or 2) acknowledge William W. Brennessel and the X-ray Crystallographic Facility of the Department of Chemistry at the University of Rochester.

- 
- <sup>1</sup> *APEX2*, version 2.2-0; Bruker AXS: Madison, WI, 2007.
- <sup>2</sup> Sheldrick, G. M. *SADABS*, version 2007/4; University of Göttingen: Göttingen, Germany, 2007.
- <sup>3</sup> *SAINT*, version 7.46A; Bruker AXS: Madison, WI, 2007.
- <sup>4</sup> Altomare, A.; Burla, M. C.; Camalli, M.; Cascarano, G. L.; Giacovazzo, C.; Guagliardi, A.; Moliterni, A. G. G.; Polidori, G.; Spagna, R. *SIR97: A new program for solving and refining crystal structures*; Istituto di Cristallografia, CNR: Bari, Italy, 1999.
- <sup>5</sup> Sheldrick, G. M. *Acta. Cryst.* **2008**, *A64*, 112-122.

Some equations of interest:

$$R_{\text{int}} = \Sigma |F_o^2 - \langle F_o^2 \rangle| / \Sigma |F_o^2|$$

$$R1 = \Sigma ||F_o| - |F_c|| / \Sigma |F_o|$$

$$wR2 = [\Sigma [w(F_o^2 - F_c^2)^2] / \Sigma [w(F_o^2)^2]]^{1/2}$$

where  $w = 1 / [\sigma^2(F_o^2) + (aP)^2 + bP]$  and

$$P = 1/3 \max(0, F_o^2) + 2/3 F_c^2$$

$$\text{GOF} = S = [\Sigma [w(F_o^2 - F_c^2)^2] / (m-n)]^{1/2}$$

where  $m$  = number of reflections and  $n$  = number of parameters

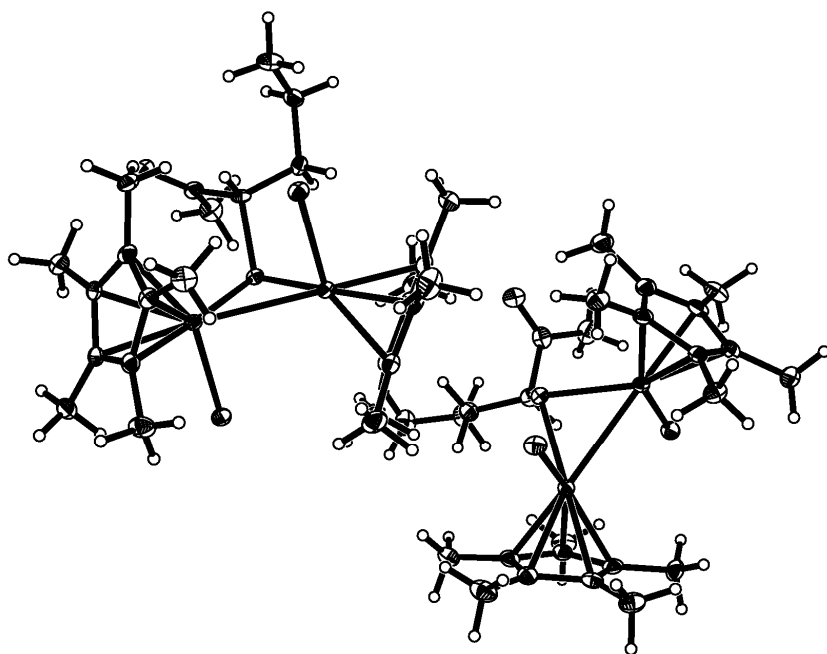

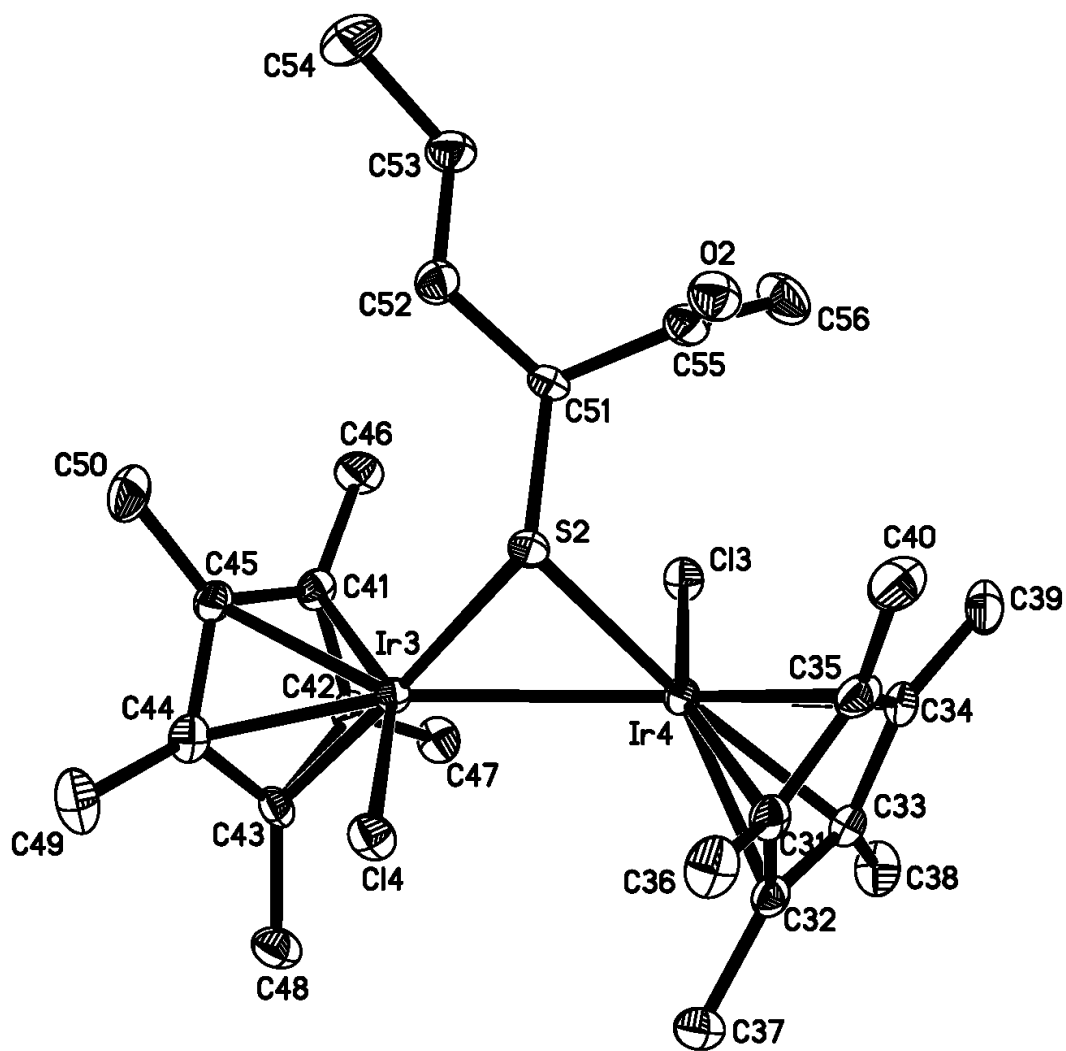



Table S-5. Crystal data and structure refinement for  $[\text{IrClCp}^*]_2(\mu\text{-H})[\mu\text{-SCH}(\text{COCH}_3)(\text{C}_3\text{H}_7)]$ , **8**.

|                                                     |                                                                     |                     |
|-----------------------------------------------------|---------------------------------------------------------------------|---------------------|
| Identification code                                 | jonmg18                                                             |                     |
| Empirical formula                                   | C <sub>26</sub> H <sub>42</sub> Cl <sub>2</sub> Ir <sub>2</sub> O S |                     |
| Formula weight                                      | 857.96                                                              |                     |
| Temperature                                         | 100.0(1) K                                                          |                     |
| Wavelength                                          | 0.71073 Å                                                           |                     |
| Crystal system                                      | Orthorhombic                                                        |                     |
| Space group                                         | <i>Pca</i> 2 <sub>1</sub>                                           |                     |
| Unit cell dimensions                                | <i>a</i> = 17.881(4) Å                                              | $\alpha = 90^\circ$ |
|                                                     | <i>b</i> = 13.857(3) Å                                              | $\beta = 90^\circ$  |
|                                                     | <i>c</i> = 22.402(5) Å                                              | $\gamma = 90^\circ$ |
| Volume                                              | 5551(2) Å <sup>3</sup>                                              |                     |
| <i>Z</i>                                            | 8                                                                   |                     |
| Density (calculated)                                | 2.053 Mg/m <sup>3</sup>                                             |                     |
| Absorption coefficient                              | 9.865 mm <sup>-1</sup>                                              |                     |
| <i>F</i> (000)                                      | 3280                                                                |                     |
| Crystal color, morphology                           | red-orange, plate                                                   |                     |
| Crystal size                                        | 0.26 x 0.20 x 0.05 mm <sup>3</sup>                                  |                     |
| Theta range for data collection                     | 1.82 to 37.78°                                                      |                     |
| Index ranges                                        | -30 ≤ <i>h</i> ≤ 30, -23 ≤ <i>k</i> ≤ 23, -38 ≤ <i>l</i> ≤ 38       |                     |
| Reflections collected                               | 129413                                                              |                     |
| Independent reflections                             | 29379 [ <i>R</i> (int) = 0.0721]                                    |                     |
| Observed reflections                                | 24140                                                               |                     |
| Completeness to theta = 37.78°                      | 99.5%                                                               |                     |
| Absorption correction                               | Multi-scan                                                          |                     |
| Max. and min. transmission                          | 0.6183 and 0.1036                                                   |                     |
| Refinement method                                   | Full-matrix least-squares on <i>F</i> <sup>2</sup>                  |                     |
| Data / restraints / parameters                      | 29379 / 1 / 601                                                     |                     |
| Goodness-of-fit on <i>F</i> <sup>2</sup>            | 1.040                                                               |                     |
| Final <i>R</i> indices [ <i>I</i> > 2σ( <i>I</i> )] | <i>R</i> 1 = 0.0370, <i>wR</i> 2 = 0.0675                           |                     |
| <i>R</i> indices (all data)                         | <i>R</i> 1 = 0.0589, <i>wR</i> 2 = 0.0762                           |                     |
| Absolute structure parameter                        | -0.012(4)                                                           |                     |
| Largest diff. peak and hole                         | 2.731 and -3.357 e.Å <sup>-3</sup>                                  |                     |
